# Supplementary material
Source: PubMed Central journal article supplement (PMC7075070)
Supplement: joces-133-237883-s1.pdf [file joces-133-237883-s1.pdf]

## SUPPLEMENTARY FIGURES

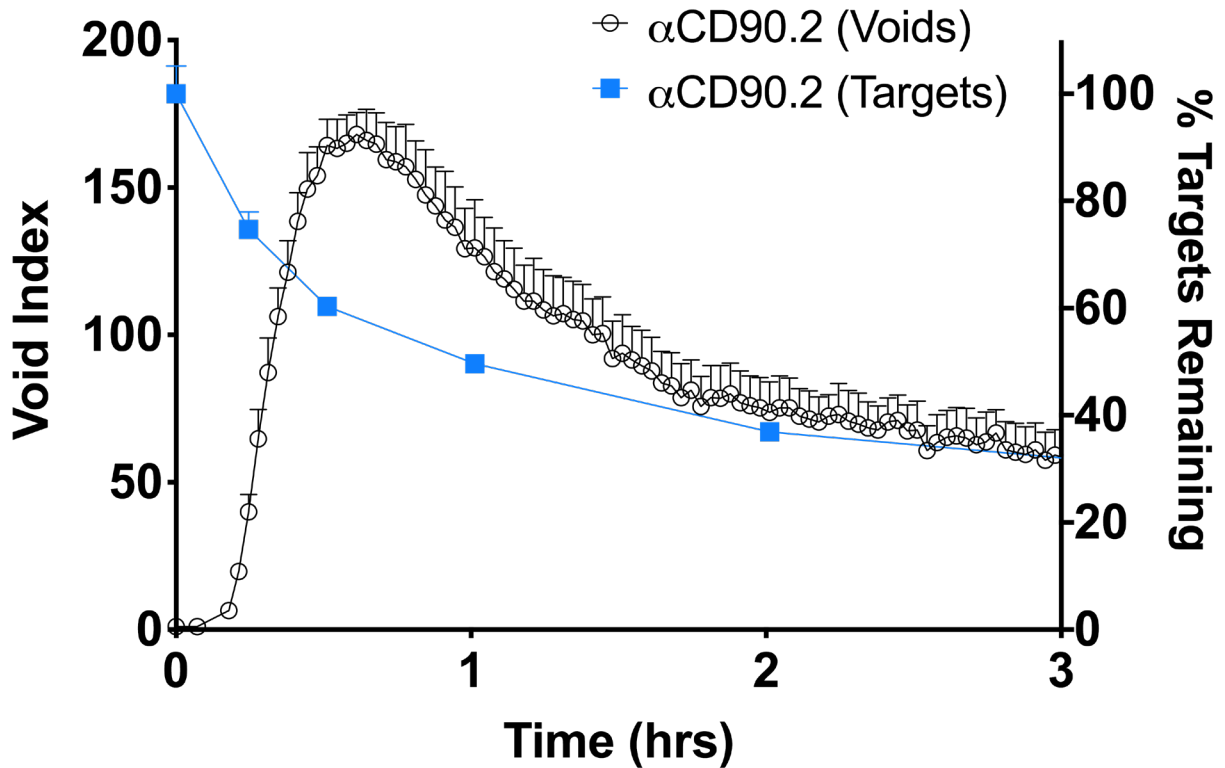

**Fig. S1. Comparison of void method with validated flow cytometric cells remaining method reveals that the timing of void accumulation matches the timing of decreasing cells remaining.** Void index (right y-axis) and cells remaining (left y-axis) were plotted together as a comparison to validate phagocytic quantitation by the void method (mean +s.e.m. of three independent tests).

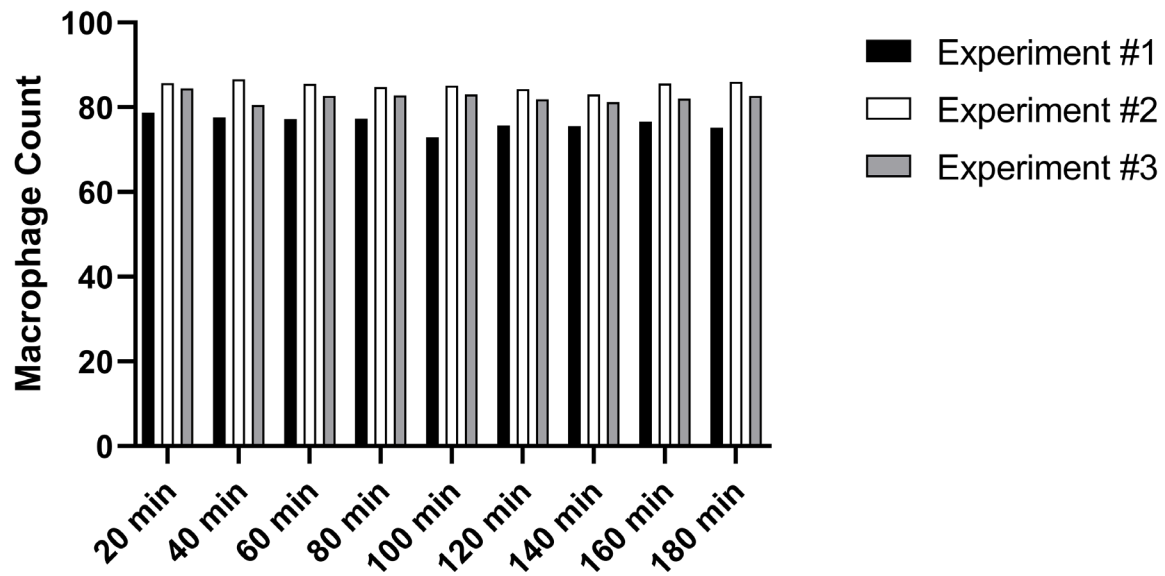

**Fig. S2. Macrophage count numbers remain stable across multiple hours in multiple experiments.** Bar chart showing macrophage count, or the average number of macrophages counted per field of view, within 20-minute time increments during three separate three hour experiments. Graph illustrates that macrophage counts remain largely unchanged through duration of imaging assays.

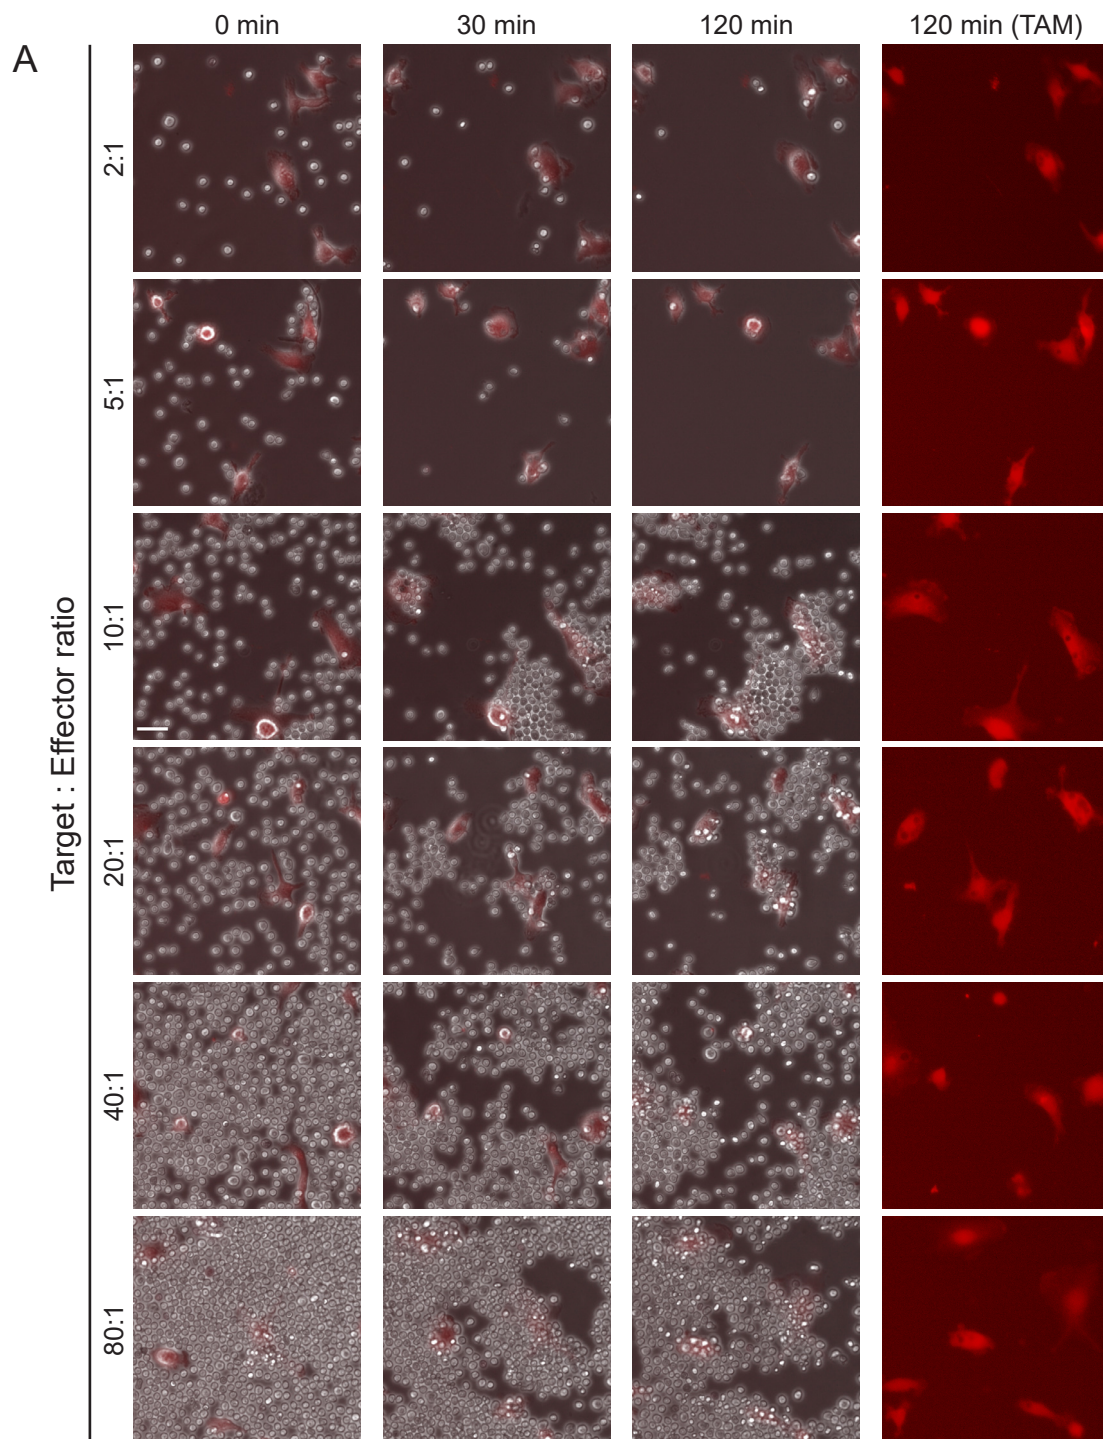

**Fig. S3. Excess target cells available for phagocytosis at most target cell : macrophage effector ratios.** Representative close-up images (merged phase contrast and TAMRA channels and **TAMRA channel only (right column)**) depicting target cell density at different Target to Effector cell ratios (range from 2:1 – 80:1) for three time-points across 2 hours (**Fig.3**). To ensure excess target cells in subsequent experiments, we used a 10:1 Target : Effector ratio in all remaining experiments. **Macrophages were labeled with TAMRA (red).**

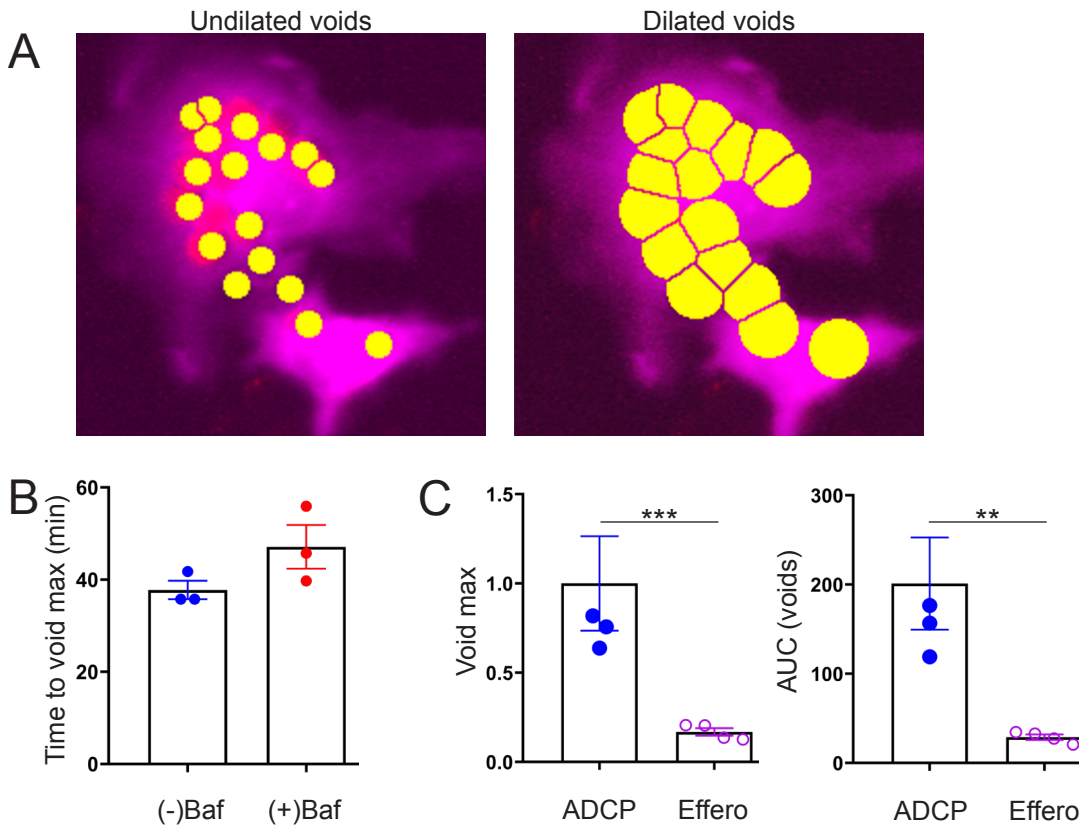

**Fig.S4. Dye uptake analysis, Bafilomycin A1 effect on void index kinetics, and comparison of ADCP versus efferocytosis.** (A) Dye uptake analysis uses void binary mask dilation. Representative close-up images depicting void masking before and after using the NIS-Elements software to “dilate” voids by increasing the number of pixels considered in the void mask to 30. (B) Void index for anti-CD90.2 (antibody) only treated or treated with Baf (mean  $\pm$ s.e.m. of three independent tests) data (**Fig.4A-E**) used to calculate measurement of time to reach maximum voids. (C) Quantitation of void index data from **Fig.4F-H** to measure overall phagocytosis by void max and AUC calculations. Data shown are mean  $\pm$ s.e.m. of three independent tests. ADCP has more phagocytic activity than efferocytosis (Effero) by these measures. Statistical significance assessed by two-tailed Students t-test, \* $P \leq 0.05$ , \*\*  $P \leq 0.01$ . A single replicate was removed from consideration for statistical analysis as an outlier in (C) according to Grubb’s test, alpha = 0.05. **Macrophages were labeled with Cell Tracker Deep Red (purple) and target cells were labeled with pHrodo Red (red).**

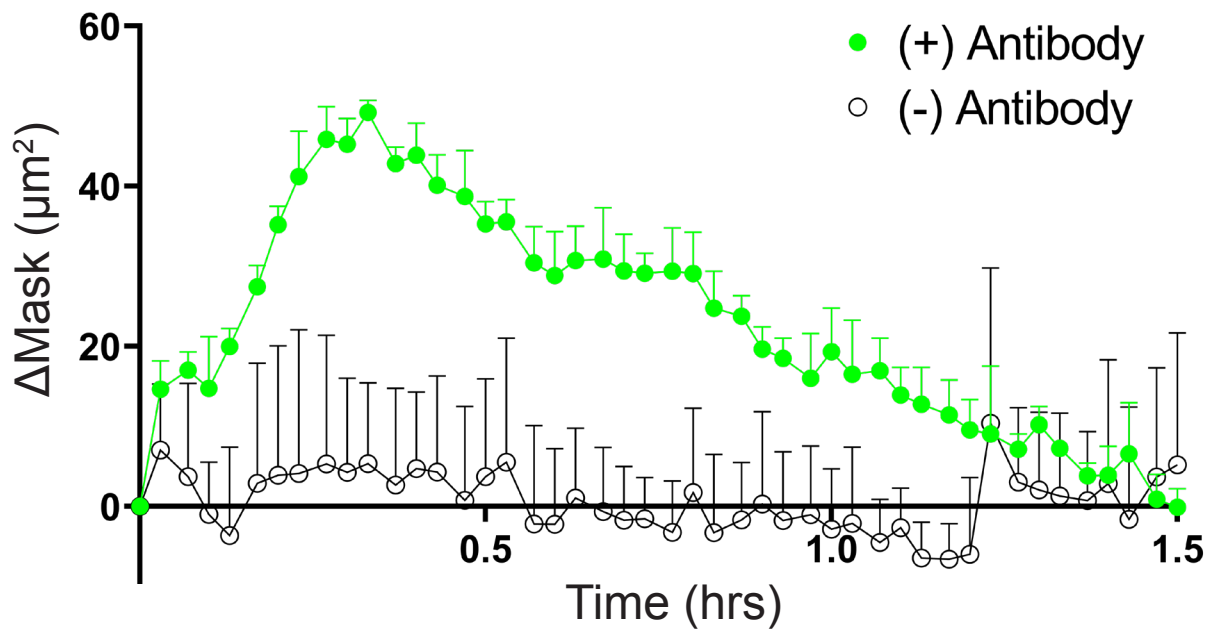

**Fig.S5. Changes in observed macrophage mask parameters during ADCP is dependent on antibody.** The change in macrophage mask parameters ( $\Delta\text{Mask}$ ) was plotted from data collected in **Fig.5A-D**. Data from anti-CD90.2 mAb treated ((+) Antibody) or untreated ((-) Antibody) conditions are plotted (mean +s.e.m. of three independent tests).

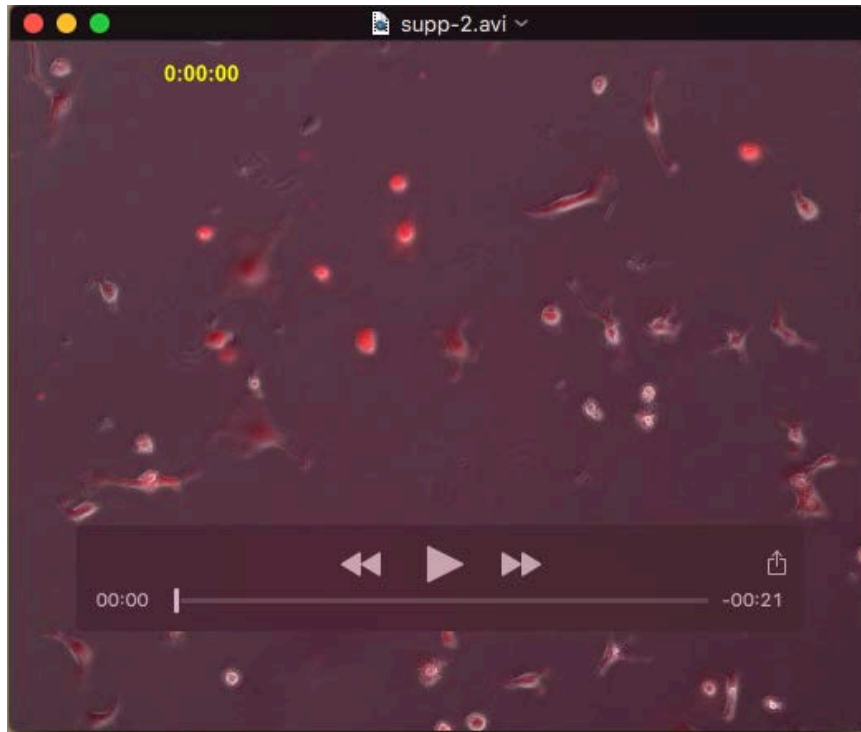

**Movie 1. Video illustrates the overall complexity of phagocytosis with live cell time-lapse high-content microscopy imaging.** Time-lapse video consists of 213 frames taken at 1.5 minute intervals over a duration of 5 hours and 21 minutes. Three channels, Phase contrast, TAMRA (TRITC), and CypHer5 (APC), were collected and merged. Time stamp (hr:min:sec) is shown. Mouse BMDC are labeled with TAMRA. CypHer5 -labeled target cells and anti-CD52 mAb are added at frame 8, which introduced a slight time delay and XY shift in position between frames 7 and 8. Individual frames 1 (0 min) and 40 (~60 min) are depicted in **Fig1C**.

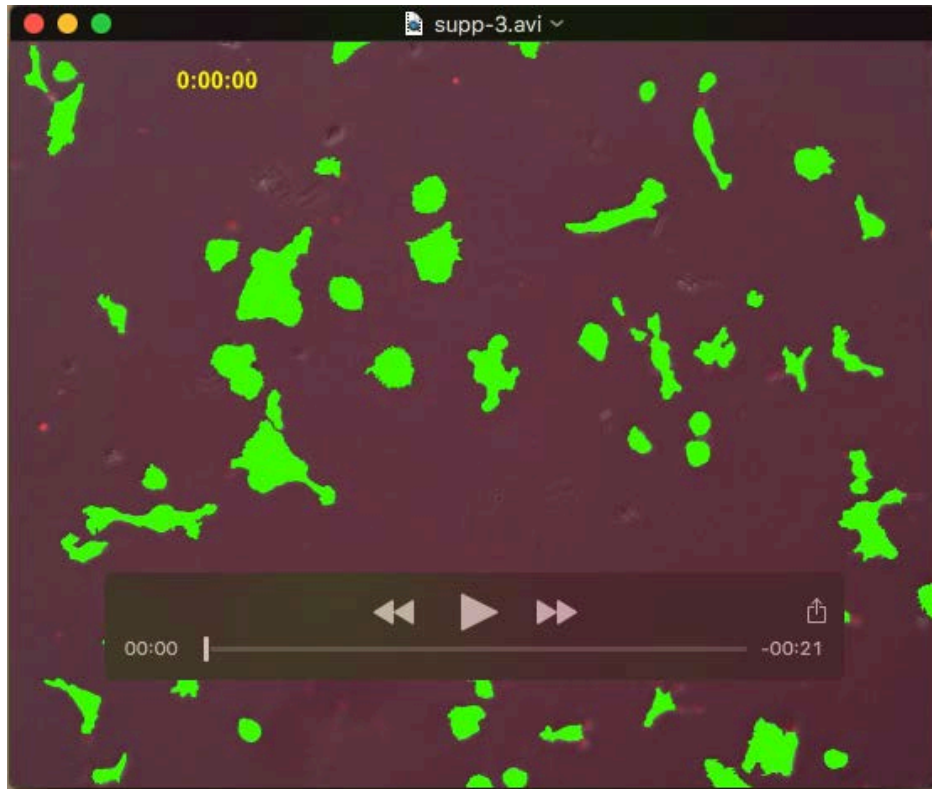

**Movie 2. Video illustrates application of macrophage binary mask over the entire course of live cell time-lapse high-content microscopy imaging.** Time-lapse video is the same as shown in Movie 1, but also contains an overlay of the macrophage binary mask manually determined with NIS-Elements software and then applied over all frames (green). Individual frames 1 (0 min) and 40 (~60 min) are depicted in **Fig1D**.

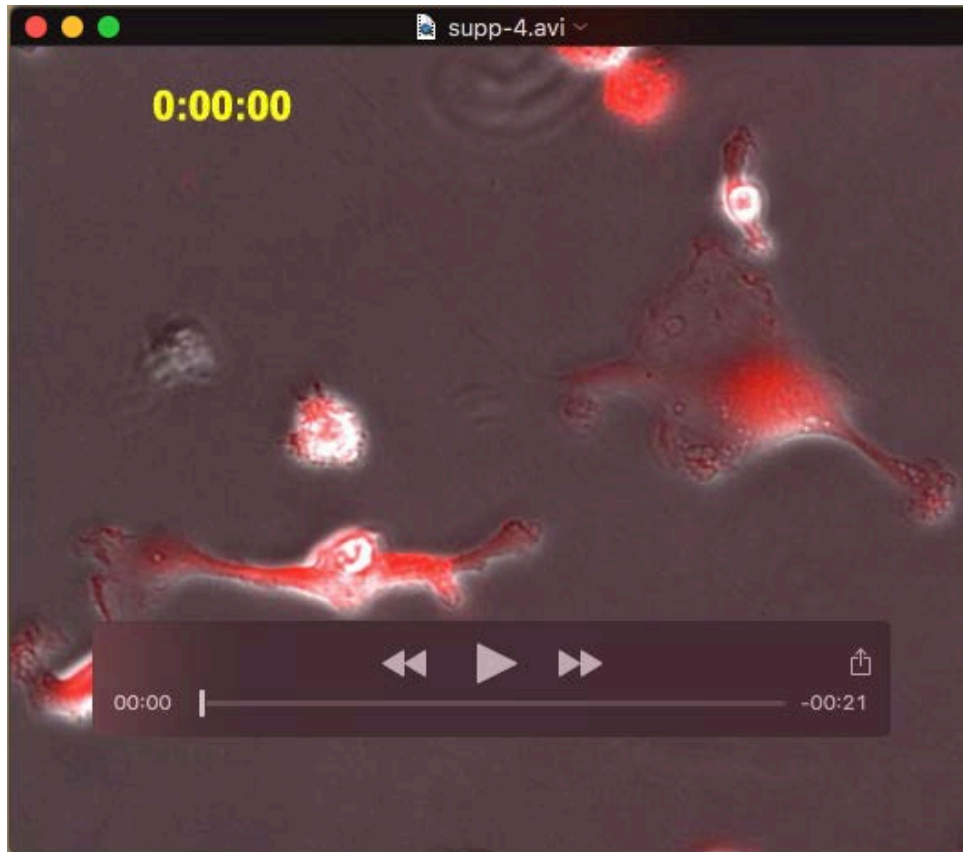

**Movie 3. Video illustrates the overall complexity of phagocytosis with live cell time-lapse high-content microscopy imaging even close-up.** Time lapse video is a close-up region of that shown in Movie 1. Close-up region is delineated by yellow box in **Fig.1C**. Individual frames 1 (0 min), 20 (~30 min), 40 (~60 min), and 60 (~90 min) are depicted in **Fig.2A Merged**.



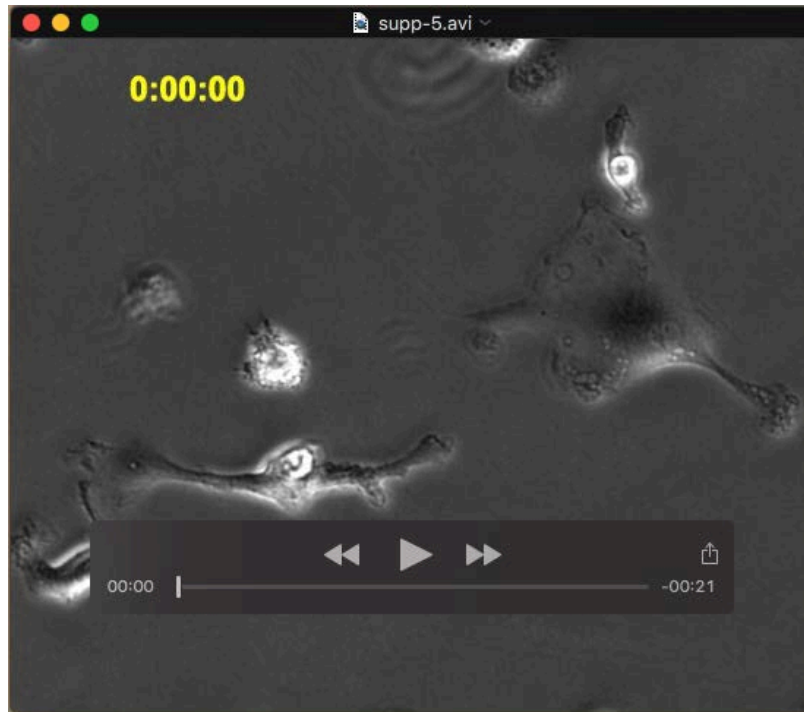

**Movie 4.** Video illustrates the overall complexity of phagocytosis with live cell time-lapse high-content microscopy imaging even close-up in phase contrast channel alone. Time-lapse video is same close-up region as shown in Movie 3, except only phase contrast channel is displayed. Individual frames 1 (0 min), 20 (~30 min), 40 (~60 min), and 60 (~90 min) are depicted in **Fig.2A** Phase.

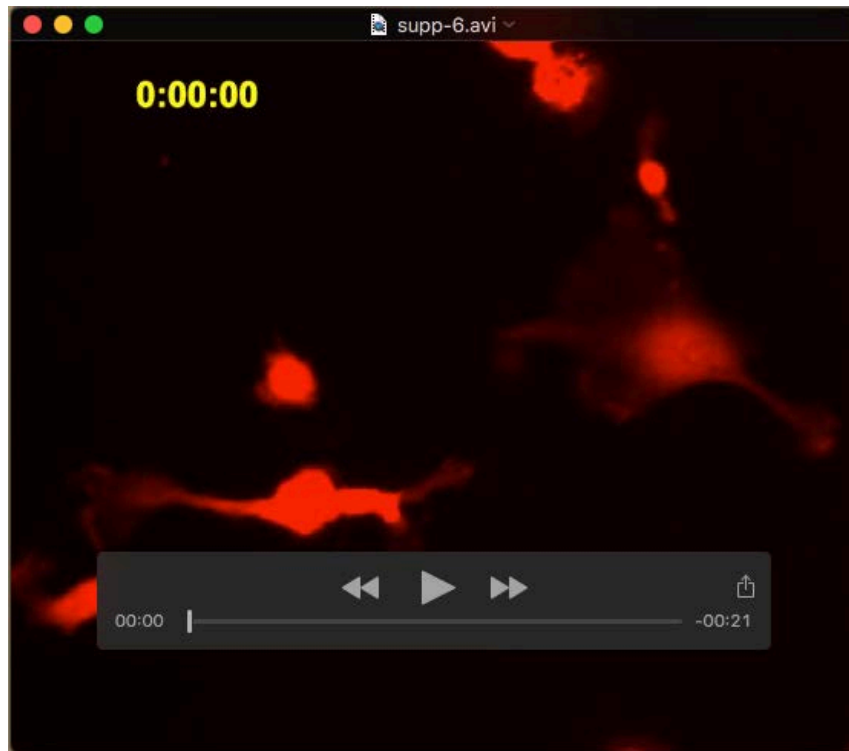

**Movie 5. Video close-up illustrates reduced complexity of phagocytosis with live cell time-lapse high-content microscopy by using only macrophage dye-label channel.** Time-lapse video is same close-up region as shown in Movie 3, except only TAMRA (TRITC) channel is displayed. Individual frames 1 (0 min), 20 (~30 min), 40 (~60 min), and 60 (~90 min) are depicted in **Fig.2A** TAMRA.

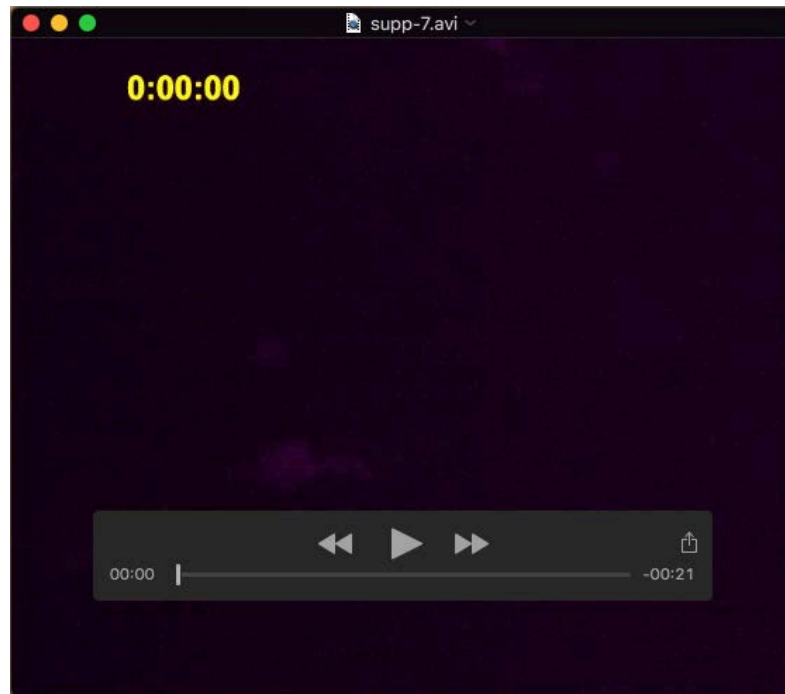

**Movie 6. Video close-up of only target cell dye-label channel during phagocytosis with live cell time-lapse high-content microscopy imaging illustrates lack of initial sensitivity of dye uptake measure.** Time-lapse video is same close-up region as shown in Movie 3, except only CypHer5 (APC) channel is displayed. Individual frames 1 (0 min), 20 (~30 min), 40 (~60 min), and 60 (~90 min) are depicted in **Fig.2A** CypHer5.

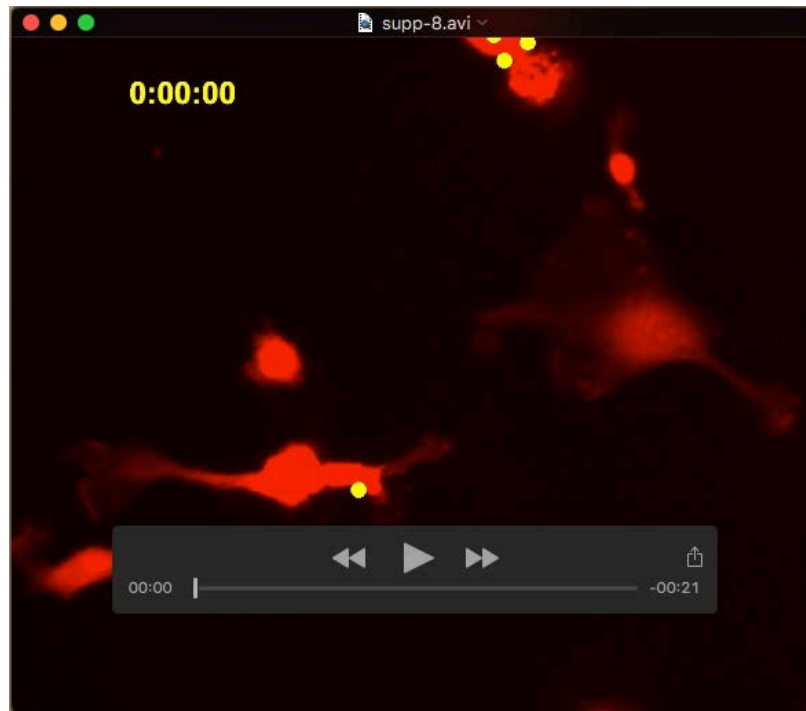

**Movie 7. Video close-up illustrates application of void binary mask over the entire course of live cell time-lapse high-content microscopy imaging.** Time-lapse video is same close-up region as shown in Movie 3, except void binary mask (yellow) is overlaid on TAMRA (TRITC) channel display. Individual frames 1 (0 min), 20 (~30 min), 40 (~60 min), and 60 (~90 min) are depicted in **Fig.2B**.

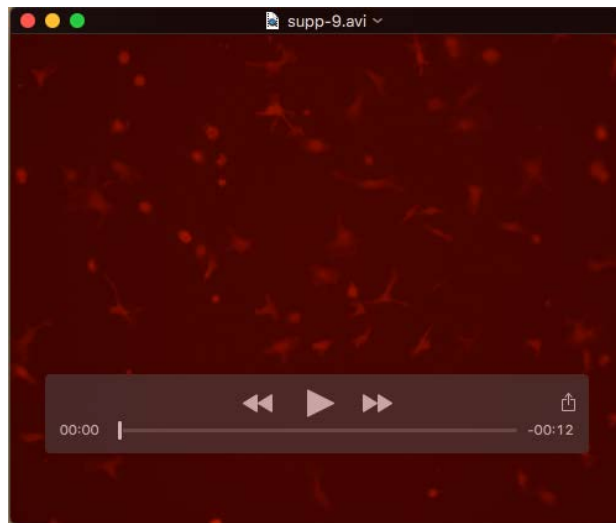

**Movie 8. Video illustrates viability of macrophages even at highest T:E ratio over the entire course of live cell time-lapse high-content microscopy imaging.** Representative time-lapse video of macrophages during an 80:1 T:E ratio experiment included in Fig.3A. TAMRA (TRITC) channel is shown for entire 4 hour experiment.

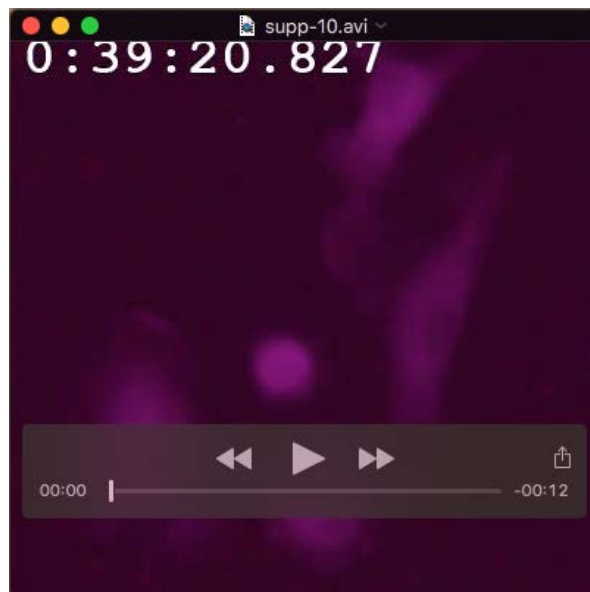

**Movie 9. Video close-up illustrates the lack of target dye (pHrodo Red) intensity increase following engulfment when macrophages are pre-treated with BafA1.** Time-lapse video is same close-up region as shown in Fig. 4A (Bottom) and includes the merged CTDR (macrophage) and pHrodo Red (target) channels. Movie starts at ~39 minutes due to delay between capture of background frames and addition of antibody and targets.

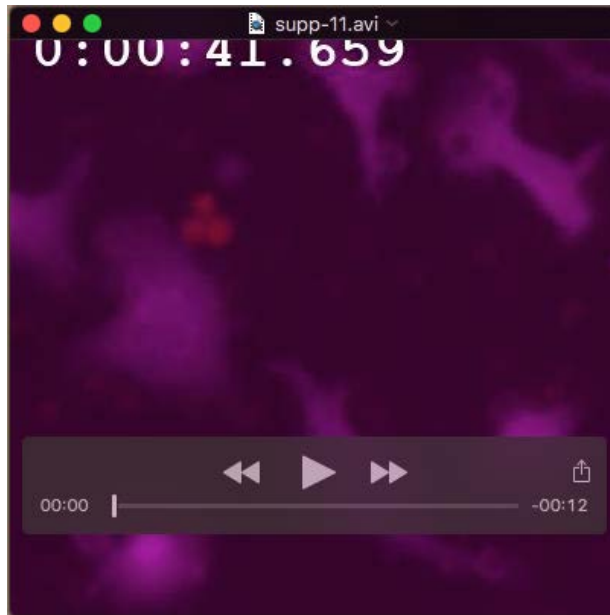

**Movie 10. Video close-up illustrates the representative target dye (pHrodo Red) intensity increase following ADCP engulfment.** Time-lapse video is same close-up region as shown in Fig. 4F (Top) and includes the merged CTDR (macrophage) and pHrodo Red (target) channels.

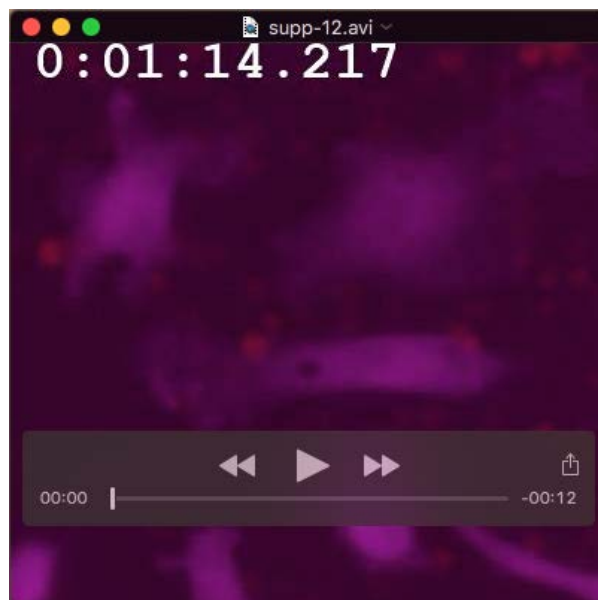

**Movie 11. Video close-up illustrates the representative target dye (pHrodo Red) intensity increase following efferocytosis engulfment.** Time-lapse video is same close-up region as shown in Fig. 4F (Bottom) and includes the merged CTDR (macrophage) and pHrodo Red (target) channels.
